# Supplementary material for: Tyro3 Targeting as a Radiosensitizing Strategy in Bladder Cancer through Cell Cycle Dysregulation
Source: MDPI journal article supplement (doi:10.3390/ijms23158671), 2022-08-04
Supplement: s1 [file s1]

Supplementary Materials:

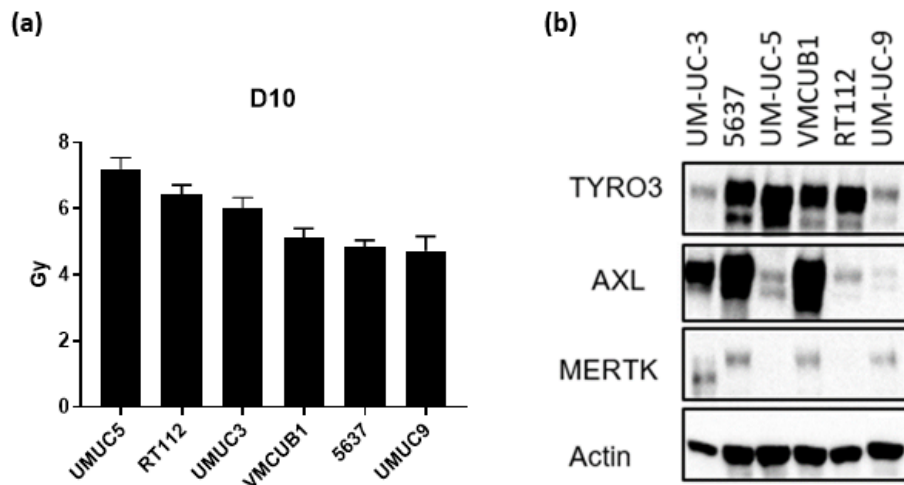

**Figure S1. Radiosensitivity and TAM expression in BCa cell lines.** D<sub>10</sub> values of 6 BCa cell lines (a) and TAM receptor expression at protein level in BCa cell lines (b).

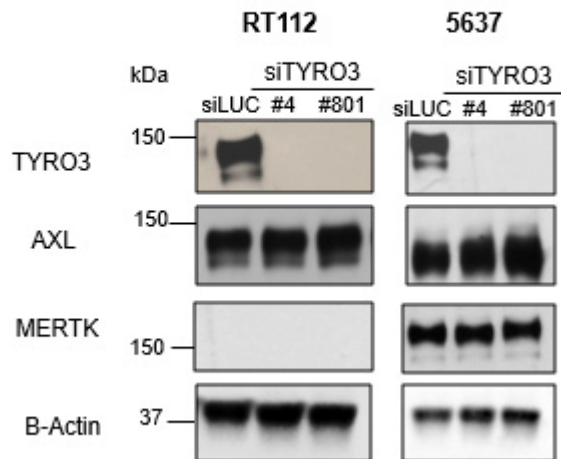

**Figure S2. TAM expression levels following TYRO3 downregulation.** siTYRO3#4 and siTYRO3#801 were used to downregulate TYRO3 and its impact on other TAM receptor expression was evaluated.

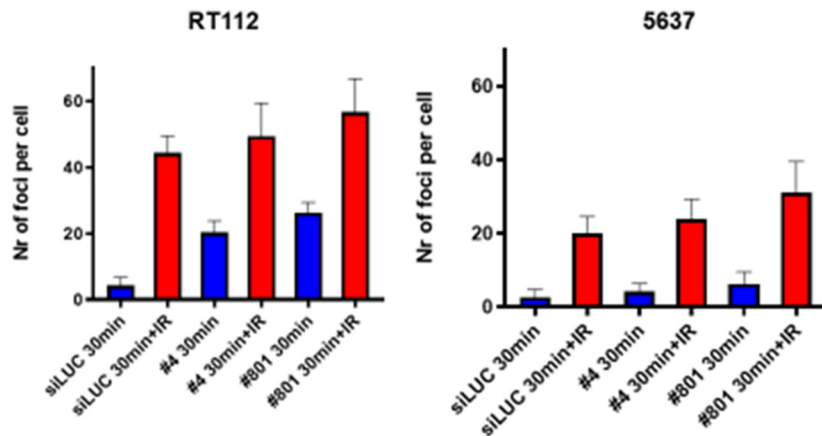

**Figure S3.**  $\gamma$ H2AX foci 30 min after 2Gy or mock irradiation in RT112 and 5637 cell lines. A representative experiment is shown.

**Table S1.** Sequences of siRNAs used in the study.

| siRNA                              | Exons targeted | Manufacturer                   | Reference          | Sense strand sequence               | Antisense strand sequence           |
|------------------------------------|----------------|--------------------------------|--------------------|-------------------------------------|-------------------------------------|
| siLUC<br>(Luciferase<br>GL2 siRNA) |                | Qiagen                         | ID: 1022070        | 5'-<br>CGUACGCGGAAUACUUCG<br>ATT-3' | 5'-<br>UCGAAGUAUUCGCGGUAC<br>GTT-3' |
| TYRO3<br>siRNA #1                  | 3/4            | Thermo<br>Fisher<br>Scientific | AM51331 ID:<br>802 | 5'-<br>GGUGUGCCAUUUUUCACA<br>GTT-3' | 5'-<br>CUGUGAAAAAUGGCACAC<br>CTT-3' |
| TYRO3<br>siRNA #4                  | 10             | Qiagen                         | SI03096212         | 5'-<br>GCUUCGAAAGAGACGGAA<br>ATT-3' | 5'-<br>UUUCCGUCUCUUUCGAAG<br>CAG-3' |
| TYRO3<br>siRNA #801                | 19             | Thermo<br>Fisher<br>Scientific | AM51331 -<br>801   | 5'-<br>GGUCUGAAUCUUCACCAU<br>CTT-3' | 5'-<br>GAUGGUGAAGAUUCAGAC<br>CTG-3' |

**Table S3.** An overview of the percentage (%) cell in G2/M Phase for RT112 cell line.

|     | siLUC 0Gy | siLUC 6 Gy | siTYRO3 #4 0Gy | siTYRO3 #4 6Gy | siTYRO3 #801 0Gy | siTYRO3 #801 6Gy |
|-----|-----------|------------|----------------|----------------|------------------|------------------|
| %   | 8.940     | 17.57      | 8.750          | 35.00          | 10.22            | 21.44            |
| S.D | 1.422     | 2.136      | 1.527          | 4.610          | 2.771            | 0.2326           |

**Table S4.** An overview of the percentage (%) cells in G2/M Phase for 5637 cell line.

|     | siLUC 0Gy | siLUC 6 Gy | siTYRO3 #4 0Gy | siTYRO3 #4 6Gy | siTYRO3 #801<br>0Gy | siTYRO3 #801 6Gy |
|-----|-----------|------------|----------------|----------------|---------------------|------------------|
| %   | 13.48     | 20.48      | 14.58          | 50.74          | 13.33               | 43.41            |
| S.D | 2.861     | 5.254      | 5.550          | 6.335          | 0.8656              | 6.761            |
